# Supplementary material for: Cytotoxicity of 9,10-Phenanthrenequinone Impairs Mitotic Progression and Spindle Assembly Independent of ROS Production in HeLa Cells
Source: MDPI journal article supplement (doi:10.3390/toxics10060327), 2022-06-16
Supplement: s1 [file s1]

# Supplementary Materials: Cytotoxicity of 9,10-Phenanthrenequinone Impairs Mitotic Progression and Spindle Assembly Independent of ROS Production in HeLa Cells

Seul Kim, Jiyeon Leem, Jeong Su Oh and Jae-Sung Kim

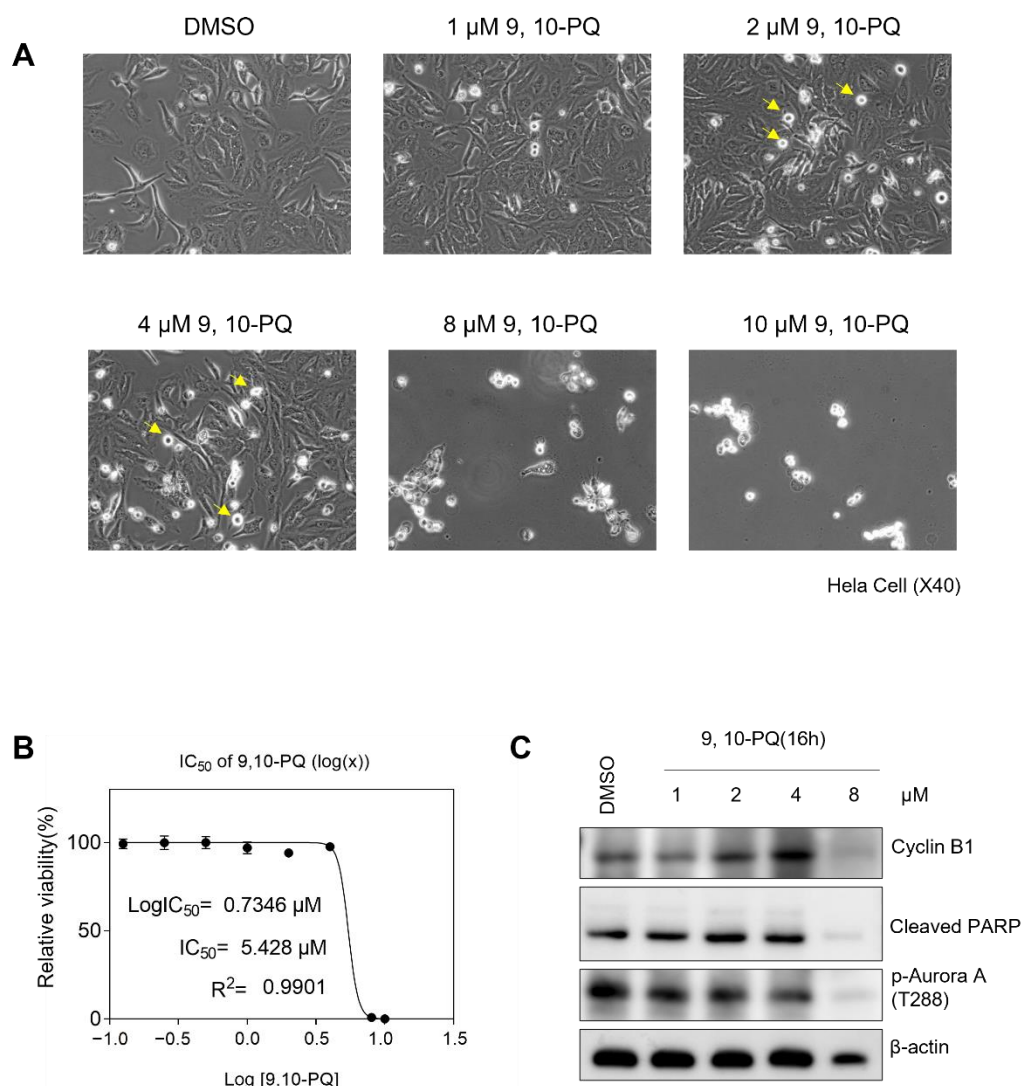

**Figure S1.** 9,10-PQ induced mitotic arrest and reduced viability in HeLa cells. **(A)** HeLa cells incubated with DMSO, or 1, 2, 4, 8, or 10  $\mu$ M 9,10-PQ for up to 24h. Cell morphology was observed by optical microscopy ( $\times$  40 magnification). Yellow arrows indicate rounded cells in mitosis. **(B)** HeLa cells were treated with 0.125, 0.250, 0.5, 1, 2, 4, 8, and 10  $\mu$ M 9,10-PQ for 24h, and a cell viability assay was conducted. Data are shown as mean  $\pm$  SEM from at least three independent experiments ( $n = 9$ ) \*\*\*  $p < 0.0001$ . **(C)** HeLa cells incubated with DMSO, or 1, 2, 4, or 8  $\mu$ M 9,10-PQ for up to 24h. The cells were harvested and analyzed by immunoblotting with cyclin B1, cleaved-PARP, p-Aurora A, and  $\beta$ -actin antibodies.
